# Supplementary material for: Structure Elucidation of a Polysaccharide from Umbilicaria esculenta and Its Immunostimulatory Activity
Source: PubMed Central journal article supplement (PMC5172621; doi:10.1371/journal.pone.0168472), 2016-12-20

CARBON\_01  
wjh-xj1-3

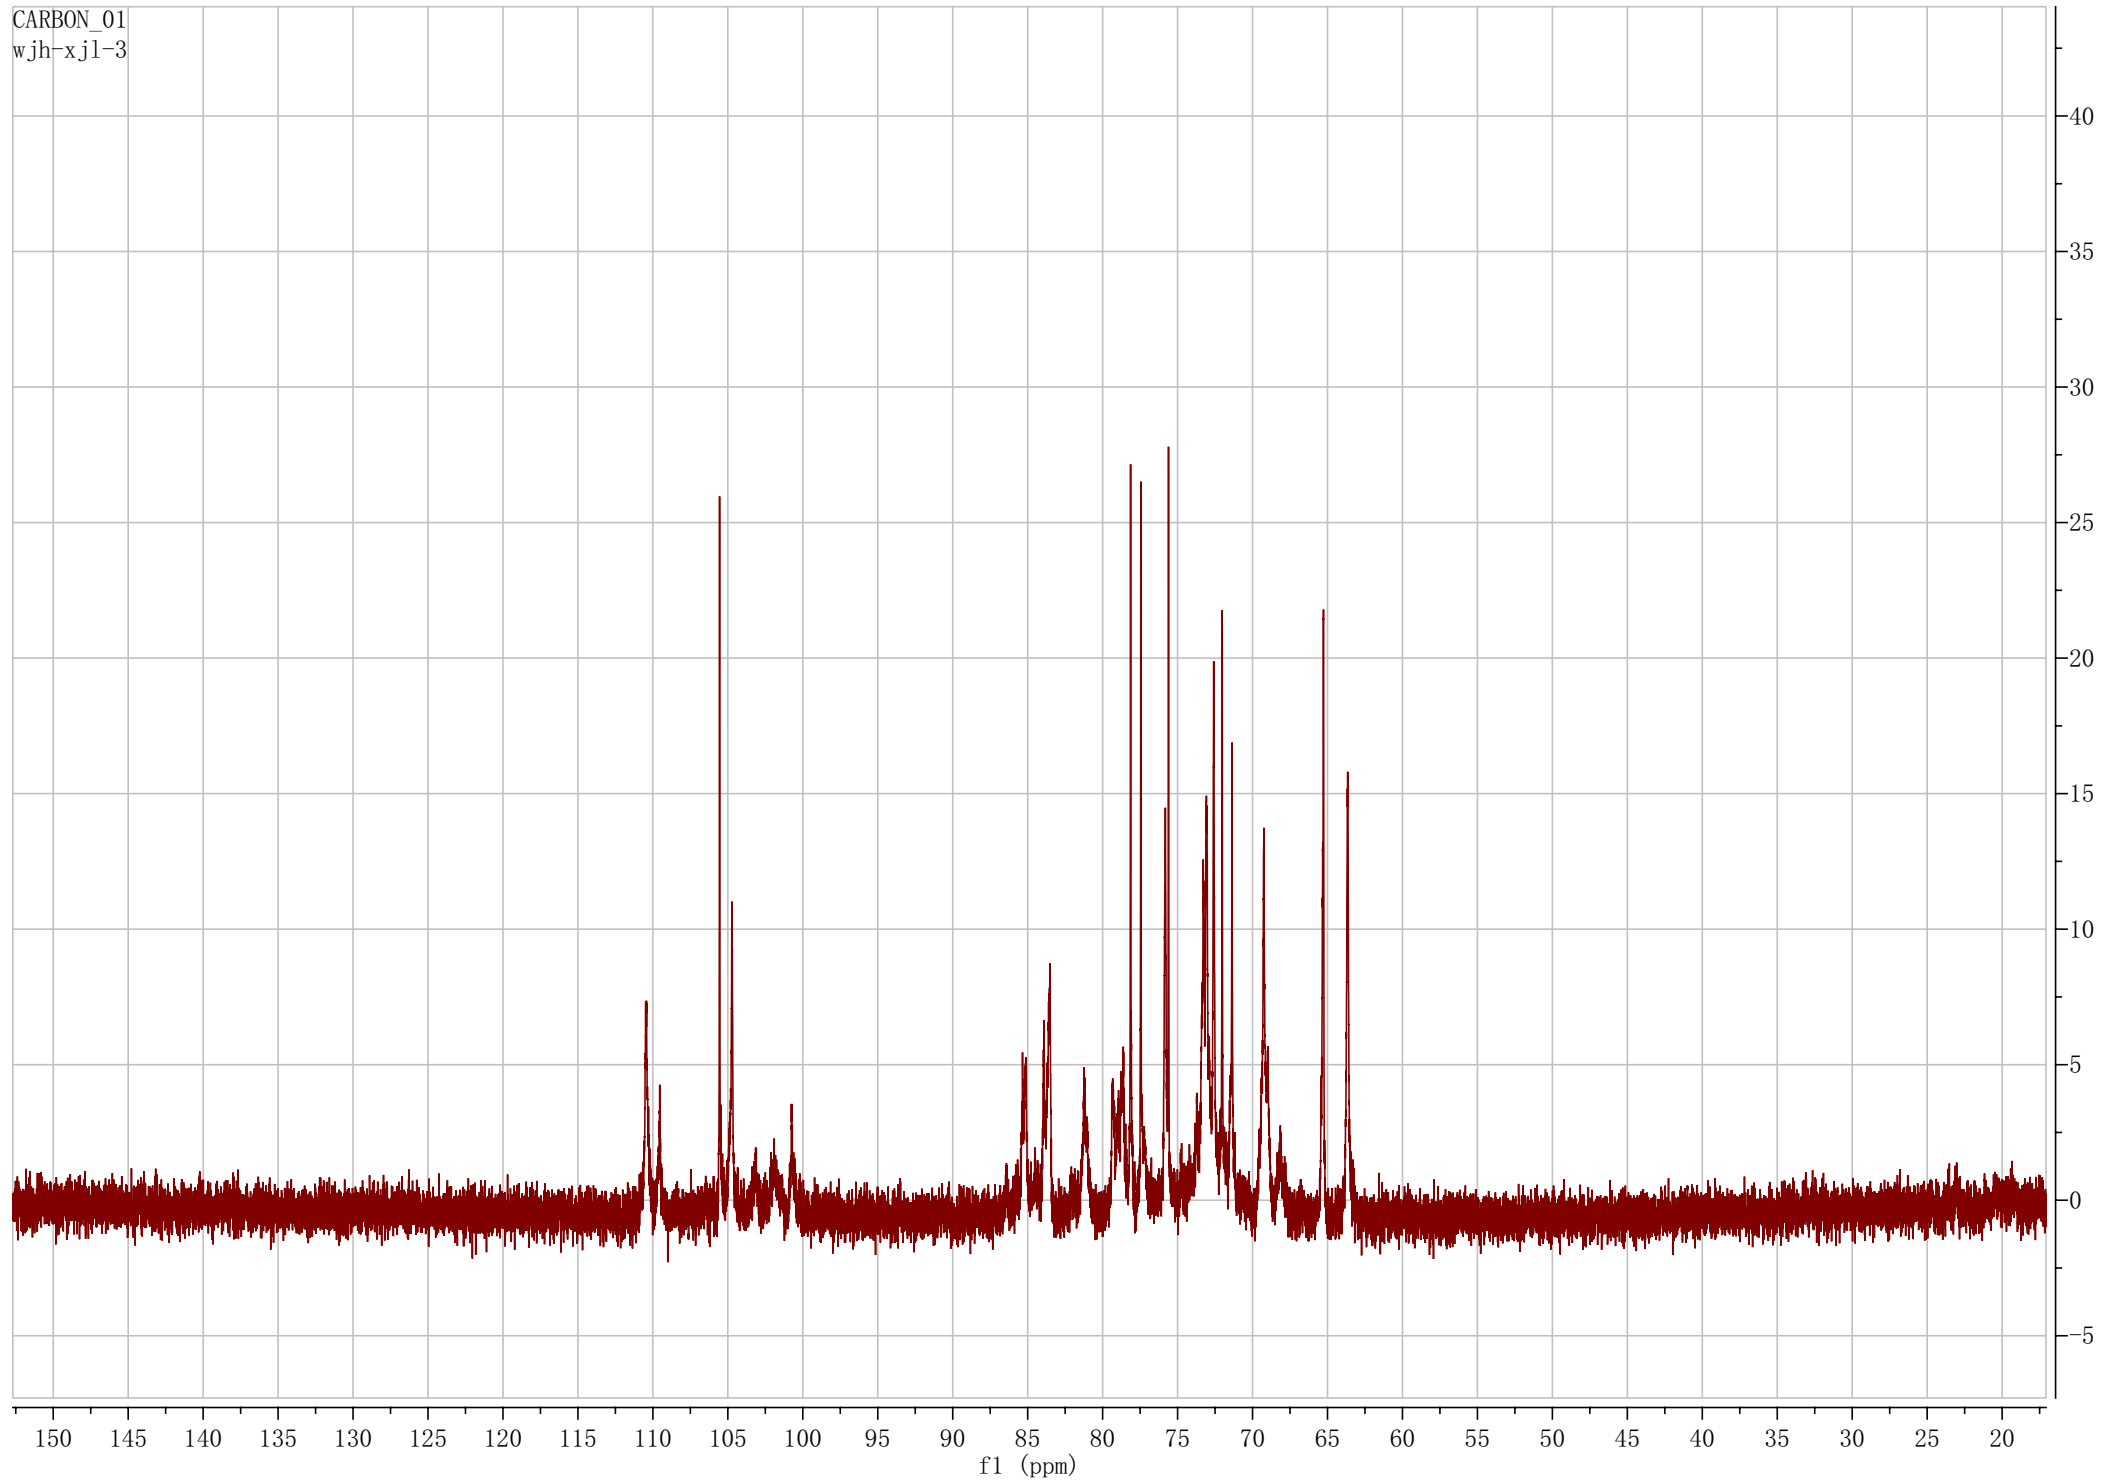

Supplement: pone.0168472.s012.pdf [file pone.0168472.s012.pdf]
